# Supplementary material for: Design and synthesis of leucylaniline derivatives as leucyl-tRNA synthetase inhibitors
Source: Royal Society of Chemistry journal article supplement (doi:10.1039/d1nj04543a), 2022-01-01
Supplement: d1nj04543a1.pdf [file d1nj04543a1.pdf]

## (Supporting Information)

### **Design and synthesis of Leucylaniline derivatives as Leucyl-tRNA Synthetase inhibitors**

Jinghan Luo<sup>a,1</sup>, Chengjun Wu<sup>a,1</sup>, Yanjun Hu<sup>a</sup>, Xingxing Jia<sup>a</sup>, Yu Chen<sup>b,\*</sup>, Tiemin Sun<sup>a,\*</sup>

<sup>a</sup> Key Laboratory of Structure-Based Drug Design and Discovery, Shenyang Pharmaceutical University, Ministry of Education, Shenyang 110016, P.R. China;

<sup>b</sup> College of Life Science and Biopharmaceutics, Shenyang Pharmaceutical University, Shenyang 110016, China

---

\* Corresponding author

<sup>1</sup>This two authors contributed equally to this work.

E-mail addresses: [suntiemini@126.com](mailto:suntiemini@126.com) (T. Sun)

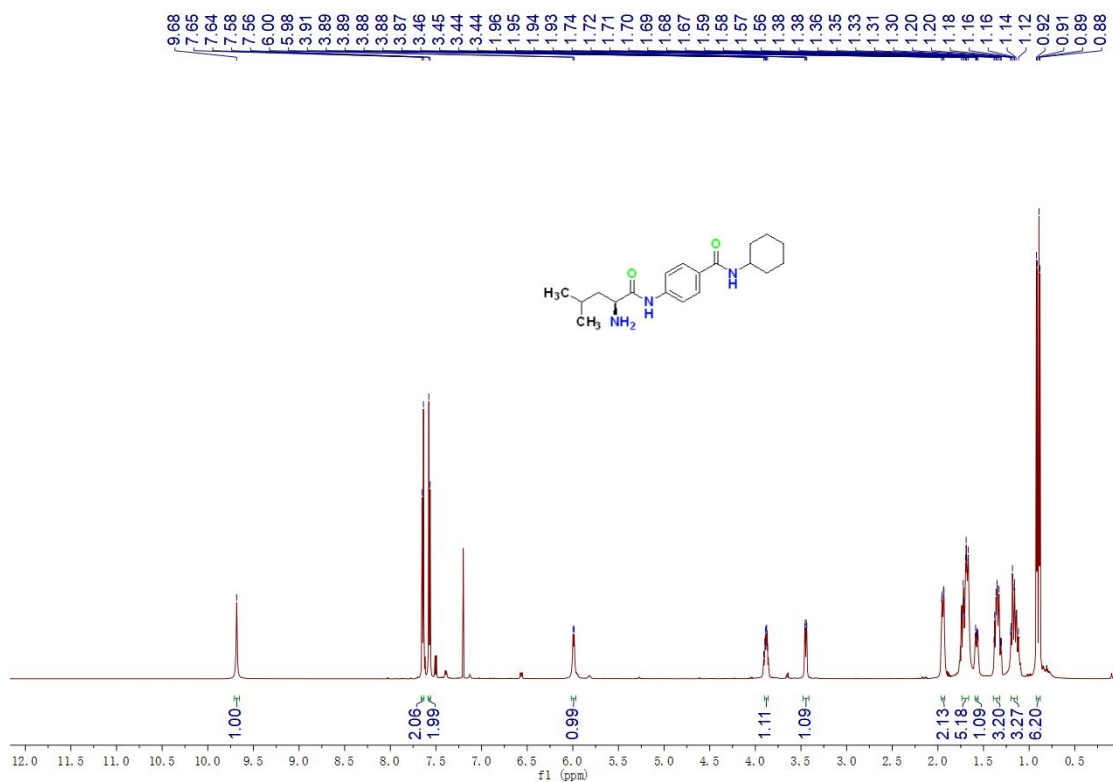

Figure S1. <sup>1</sup>H-NMR spectrum of compound (1)

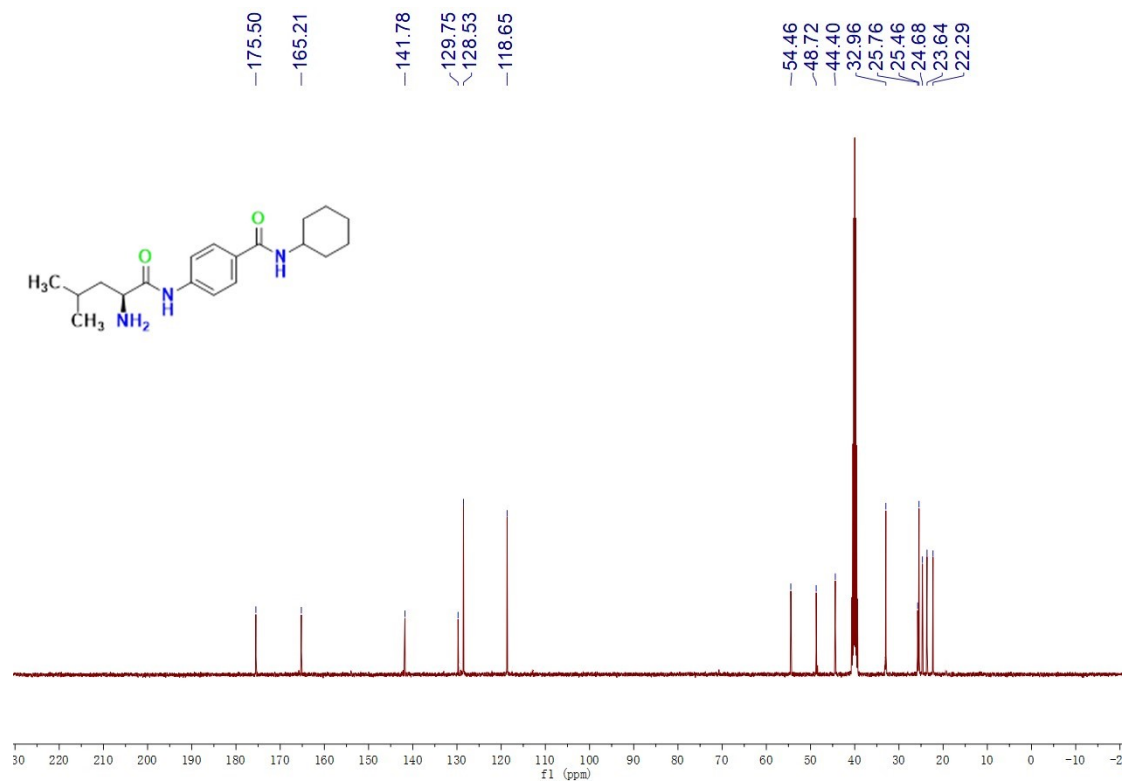

Figure S2. <sup>13</sup>C-NMR spectrum of compound (1)

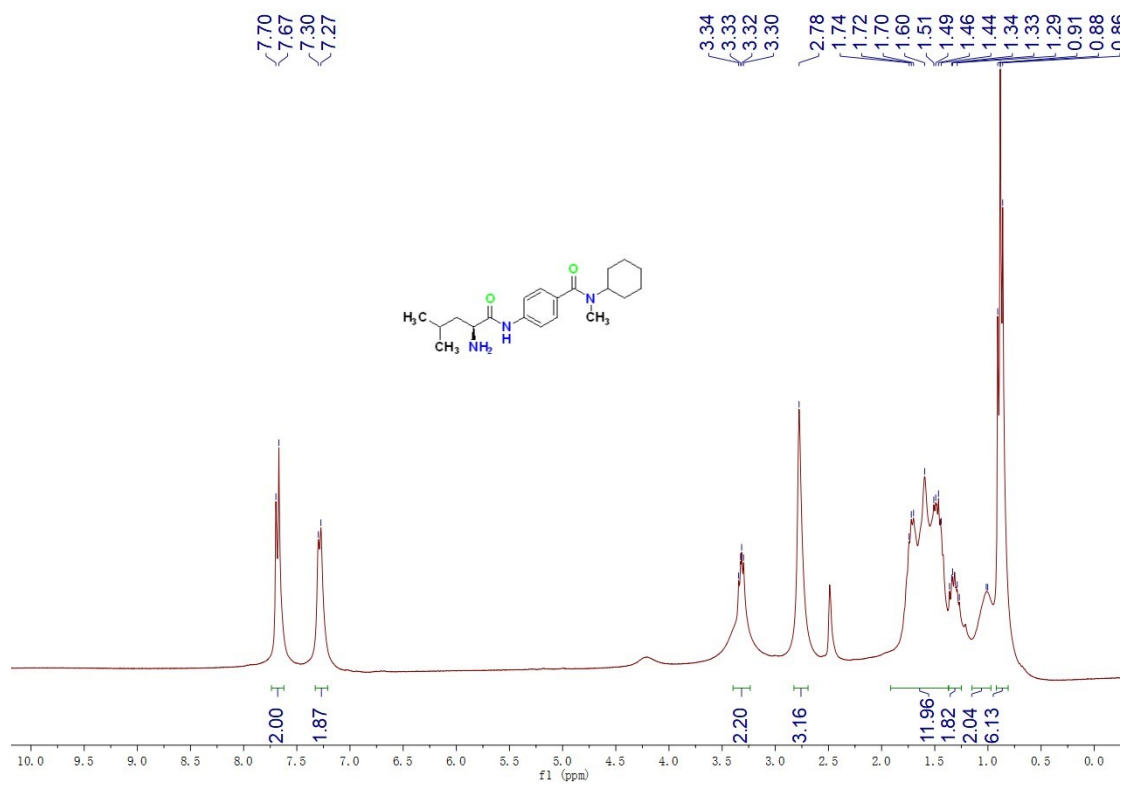

Figure S3. <sup>1</sup>H-NMR spectrum of compound (2)

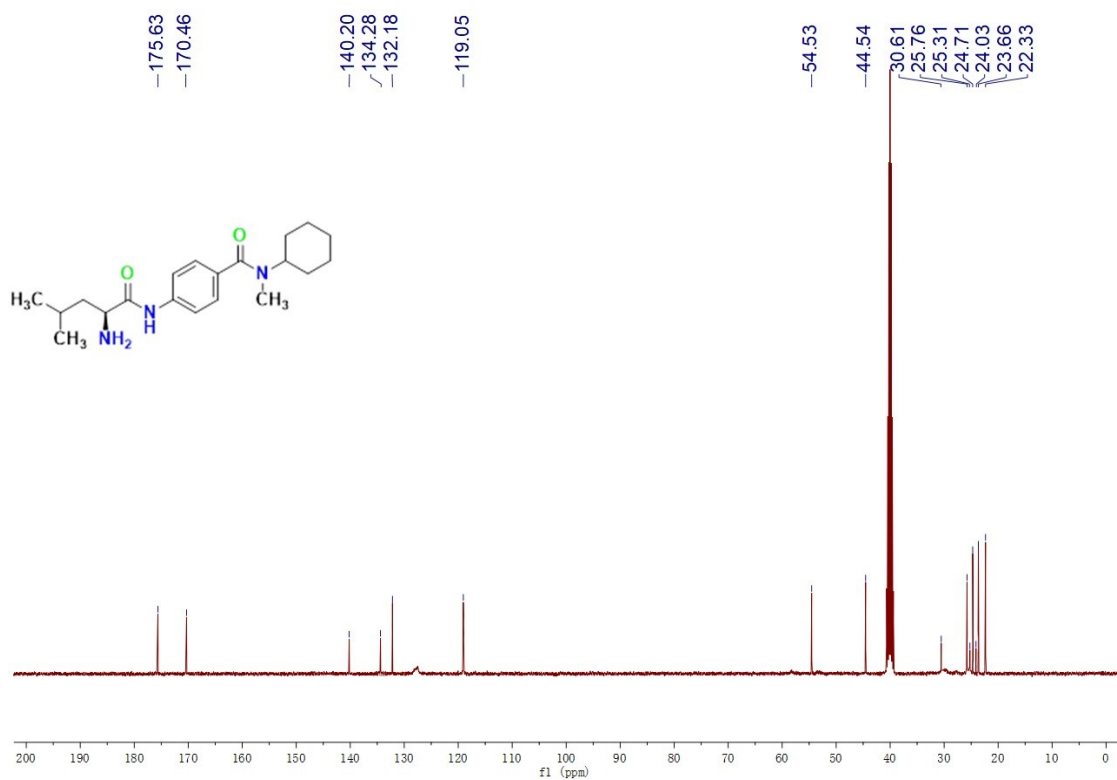

Figure S4. <sup>13</sup>C-NMR spectrum of compound (2)

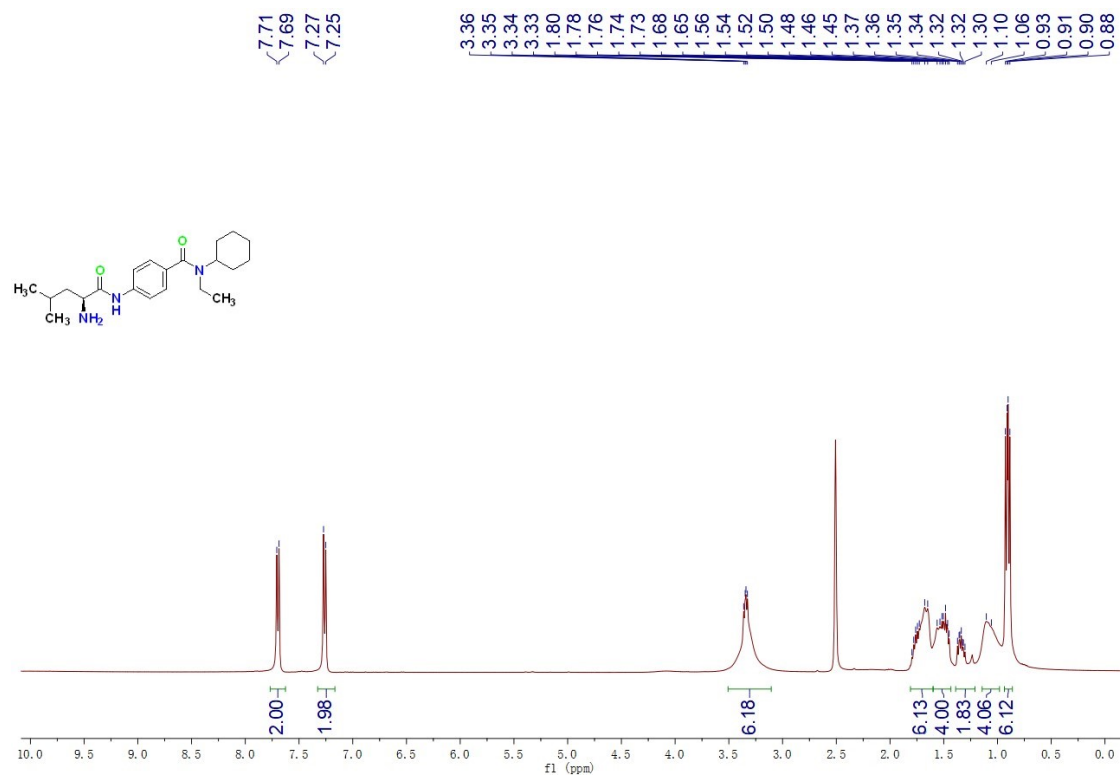

Figure S5. <sup>1</sup>H-NMR spectrum of compound (3)

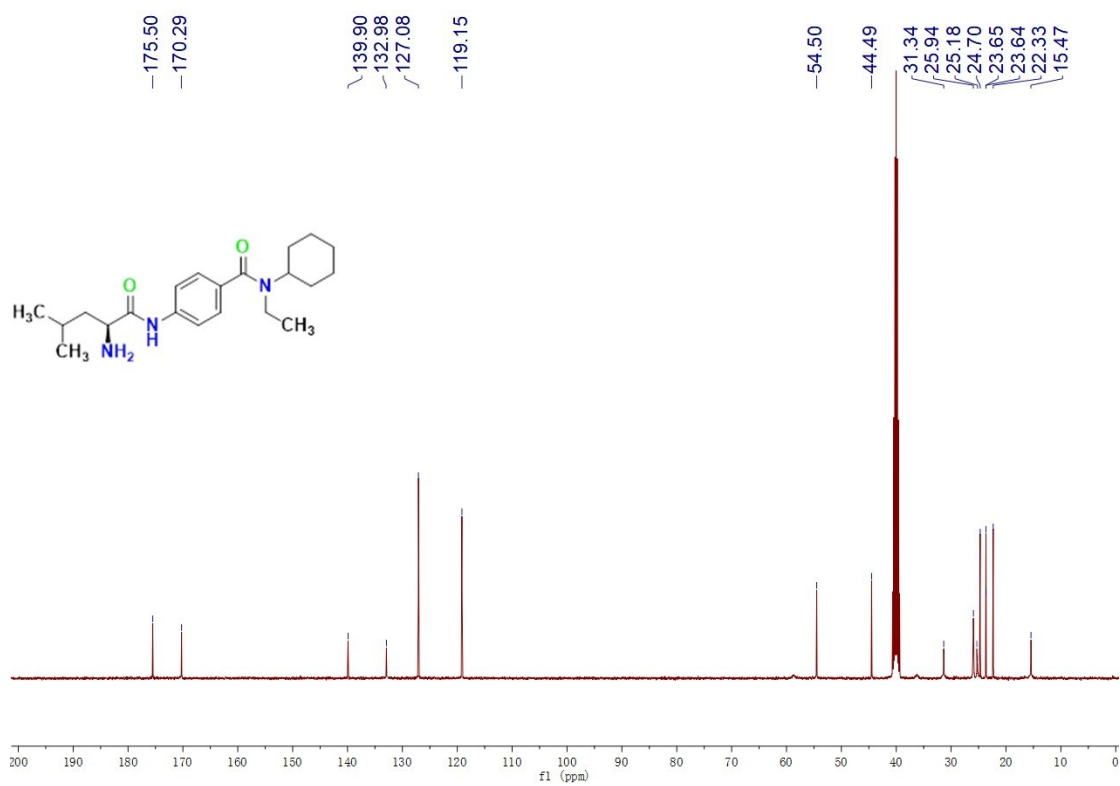

Figure S6. <sup>13</sup>C-NMR spectrum of compound (3)

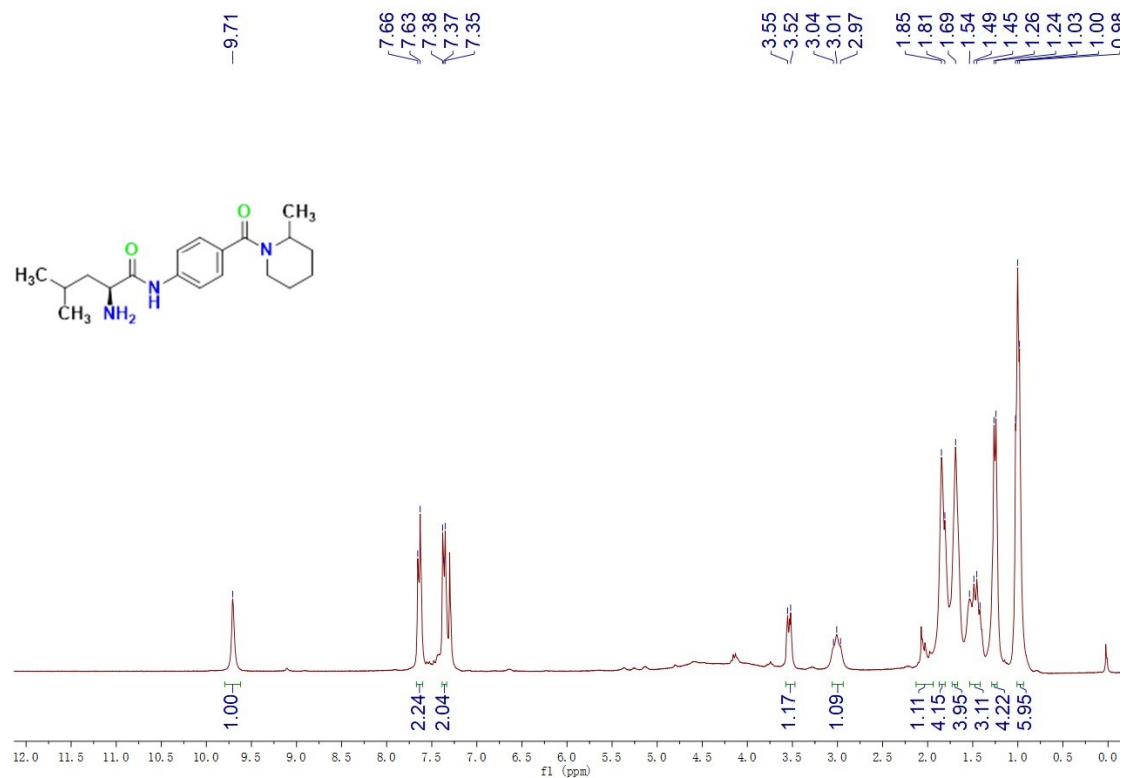

Figure S7. <sup>1</sup>H-NMR spectrum of compound (4)

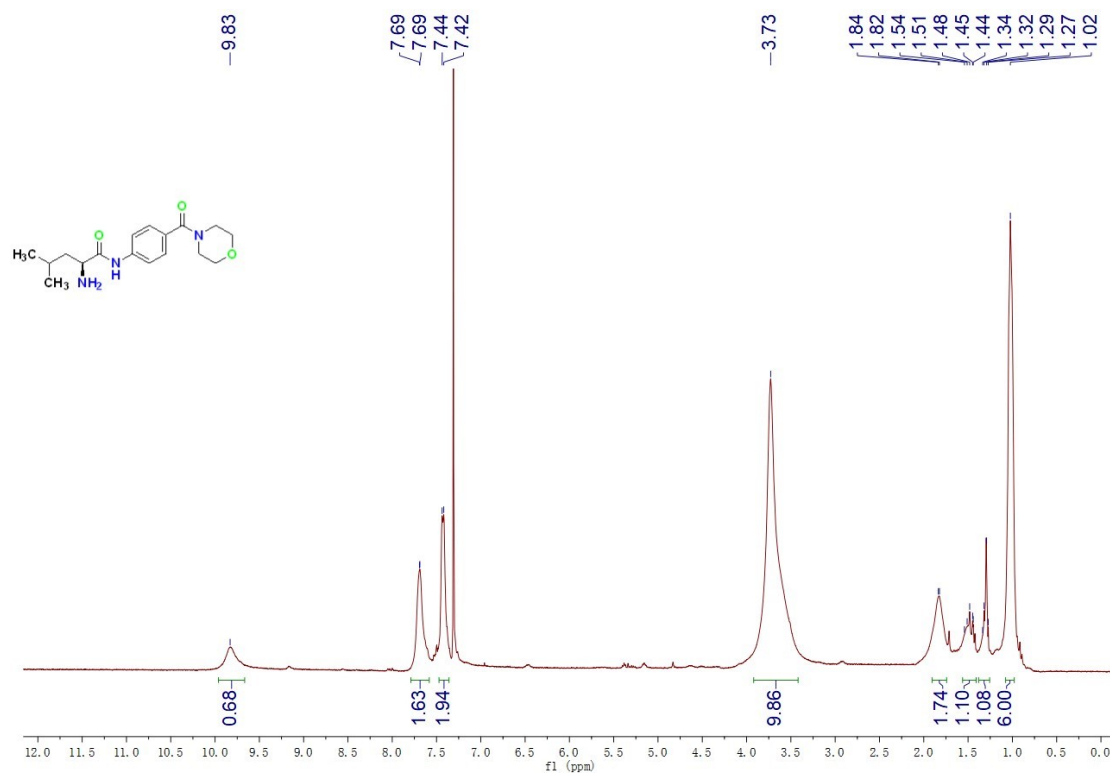

Figure S8. <sup>1</sup>H-NMR spectrum of compound (5)

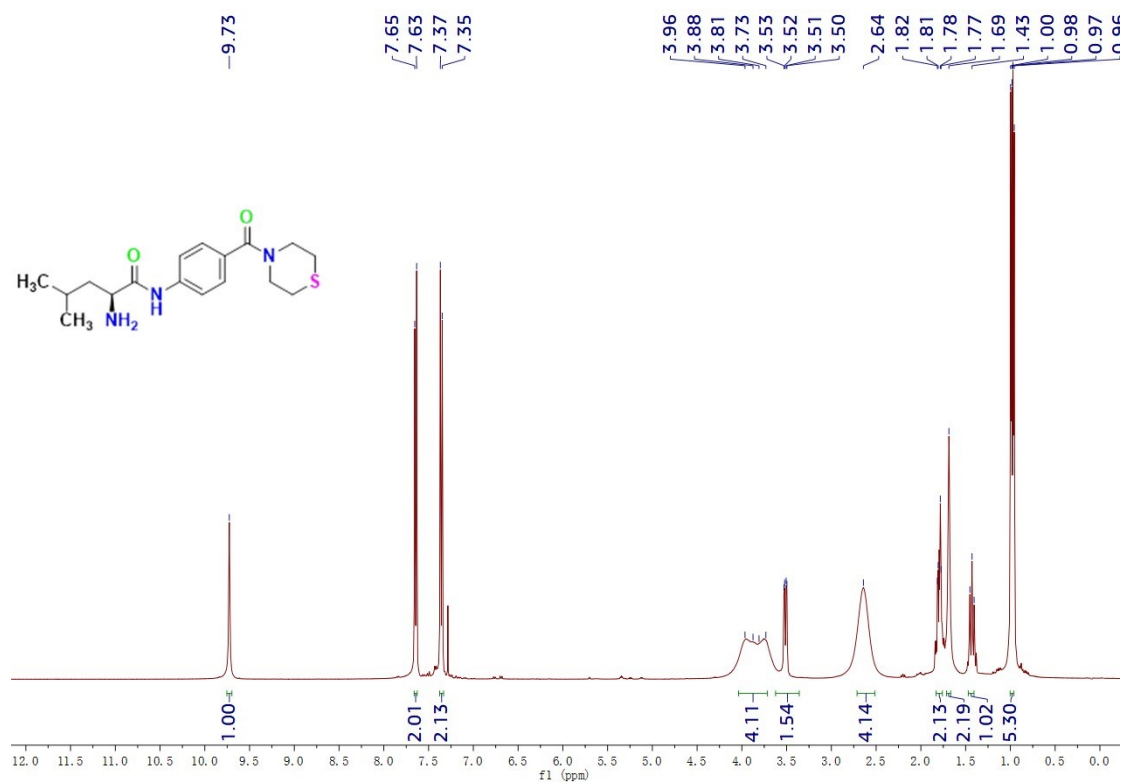

Figure S9. <sup>1</sup>H-NMR spectrum of compound (6)

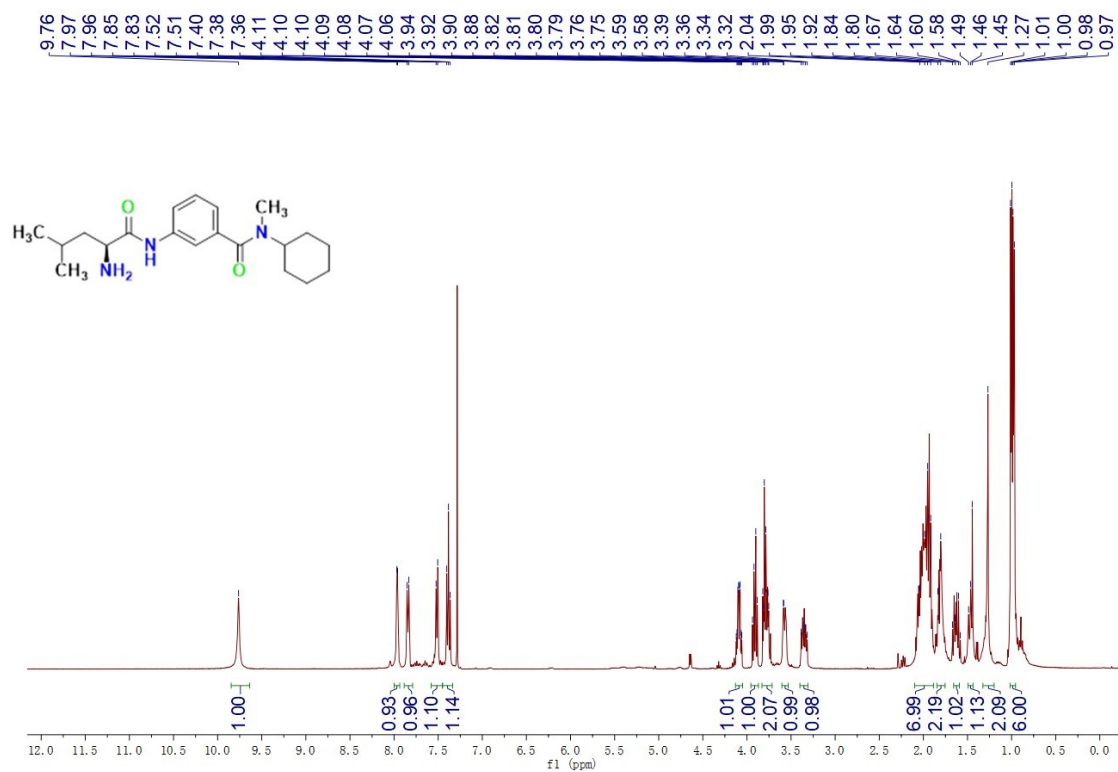

Figure S10. <sup>1</sup>H-NMR spectrum of compound (8)

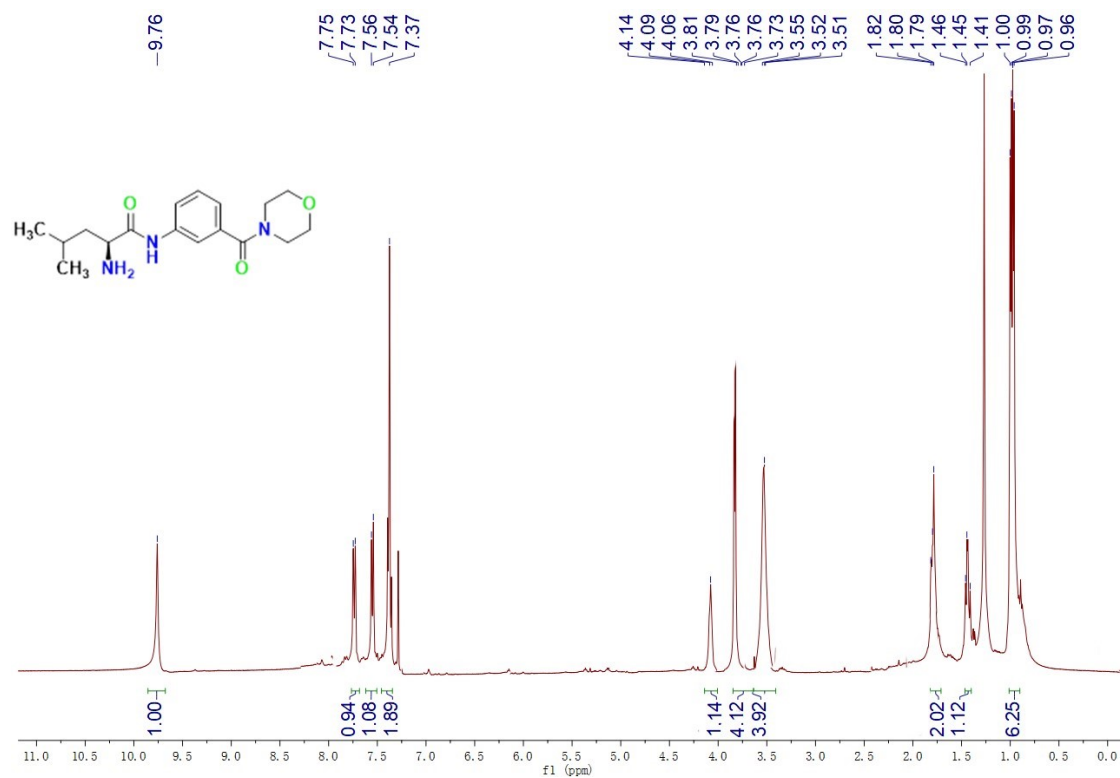

Figure S11. <sup>1</sup>H-NMR spectrum of compound (10)

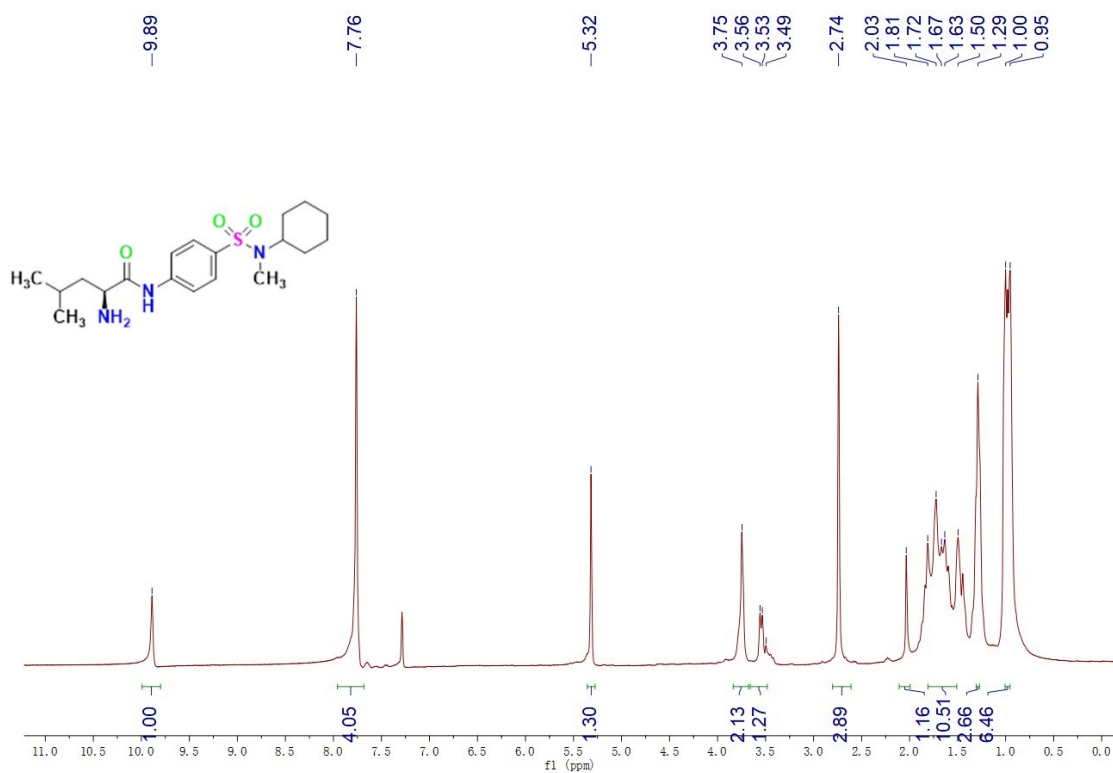

Figure S12. <sup>1</sup>H-NMR spectrum of compound (12)

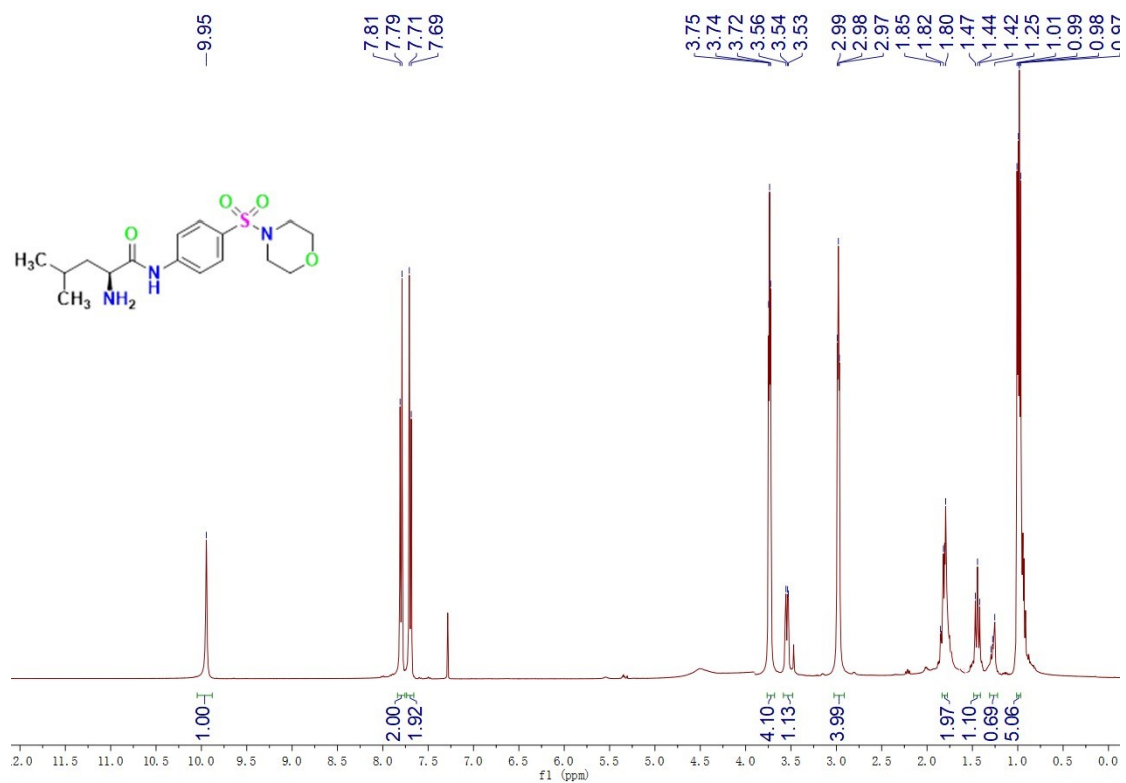

Figure S13. <sup>1</sup>H-NMR spectrum of compound (13)

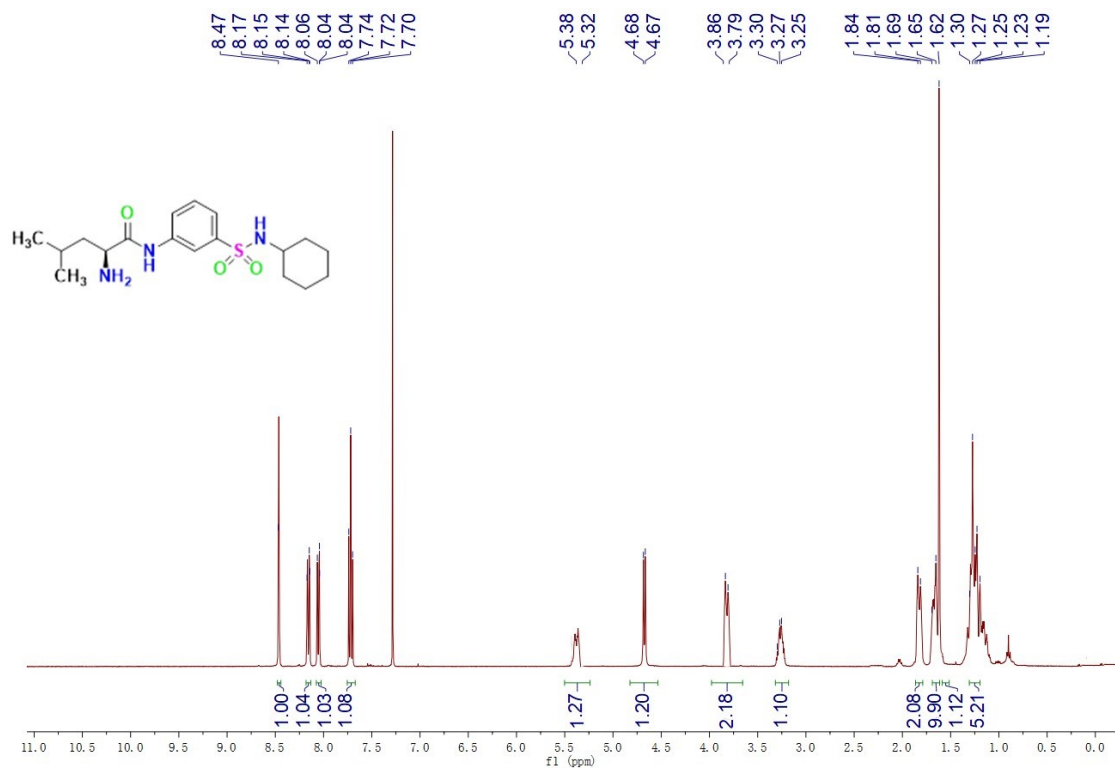

Figure S14. <sup>1</sup>H-NMR spectrum of compound (14)



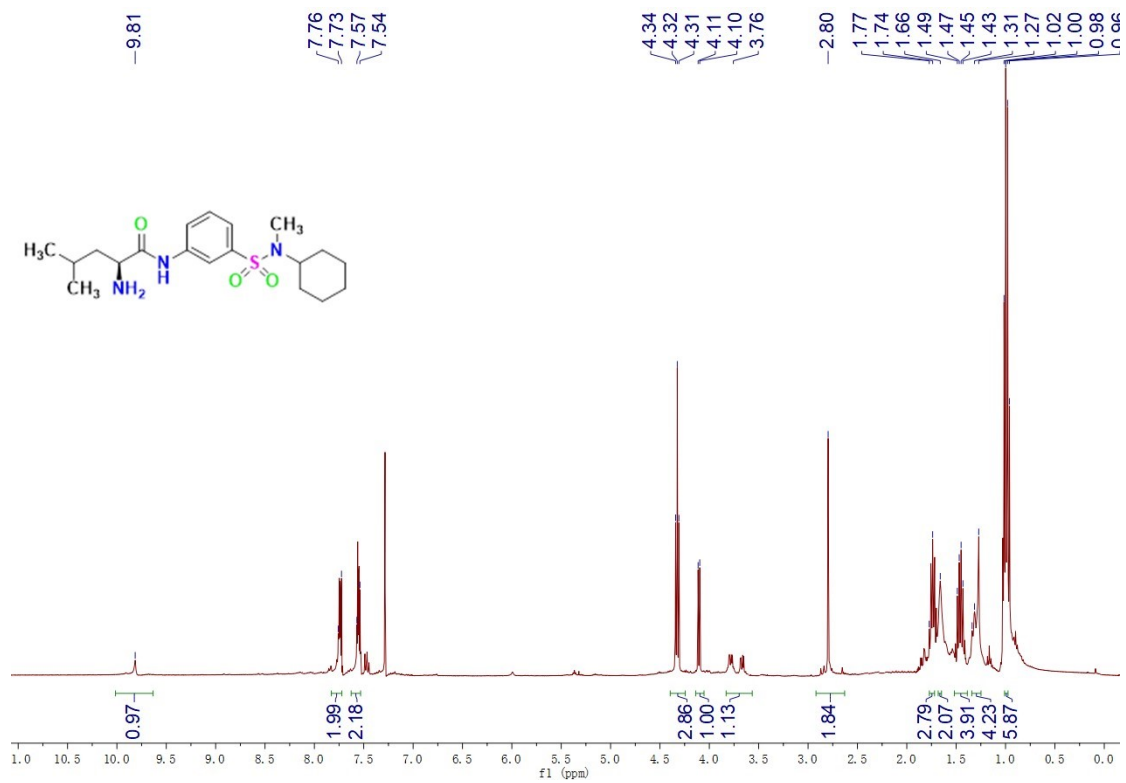

Figure S15. <sup>1</sup>H-NMR spectrum of compound (15)

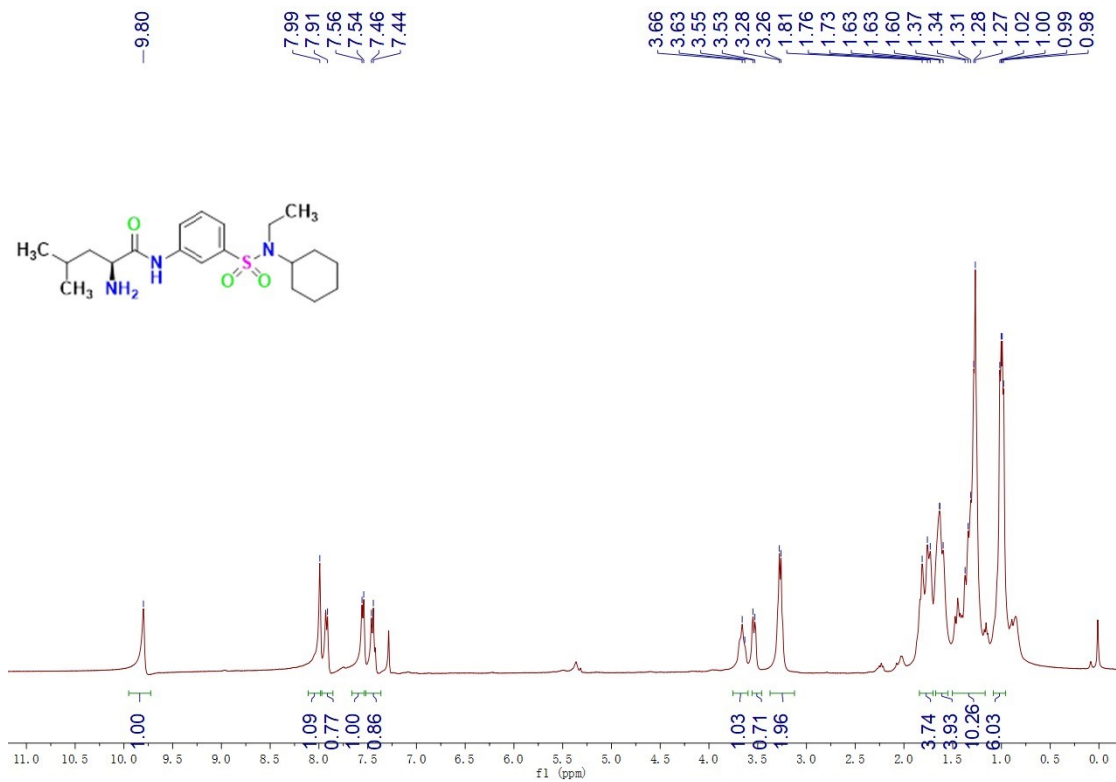

Figure S16. <sup>1</sup>H-NMR spectrum of compound (16)

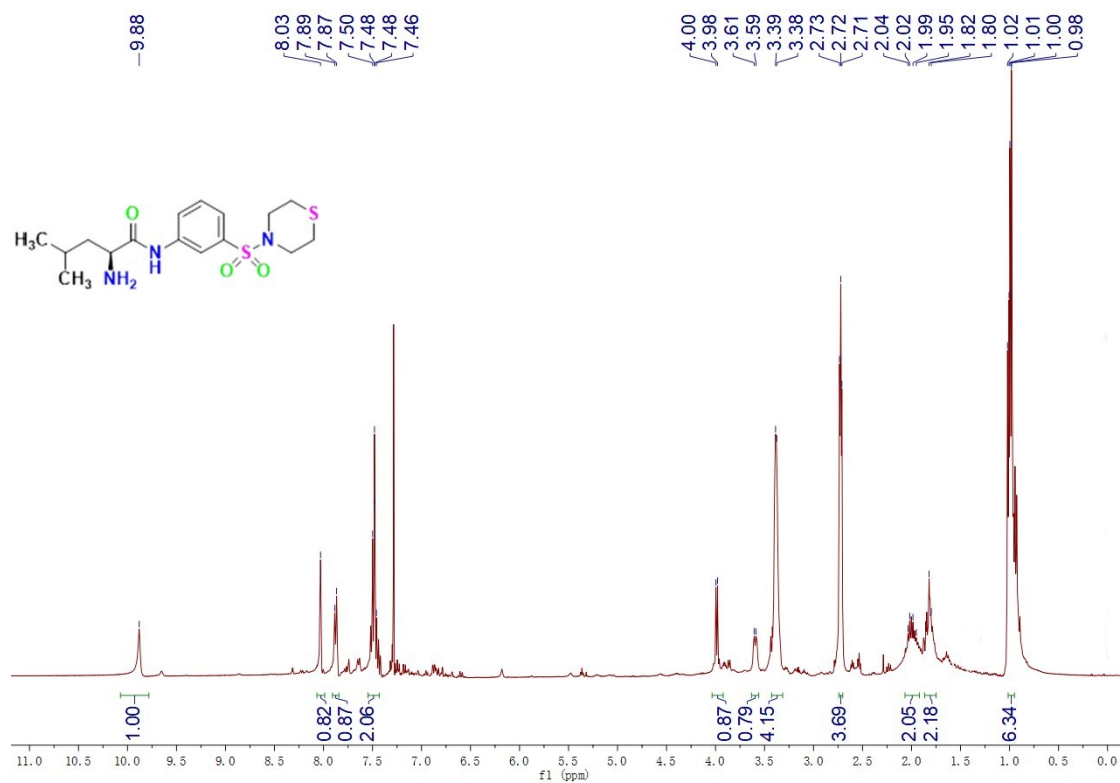

Figure S17. <sup>1</sup>H-NMR spectrum of compound (17)

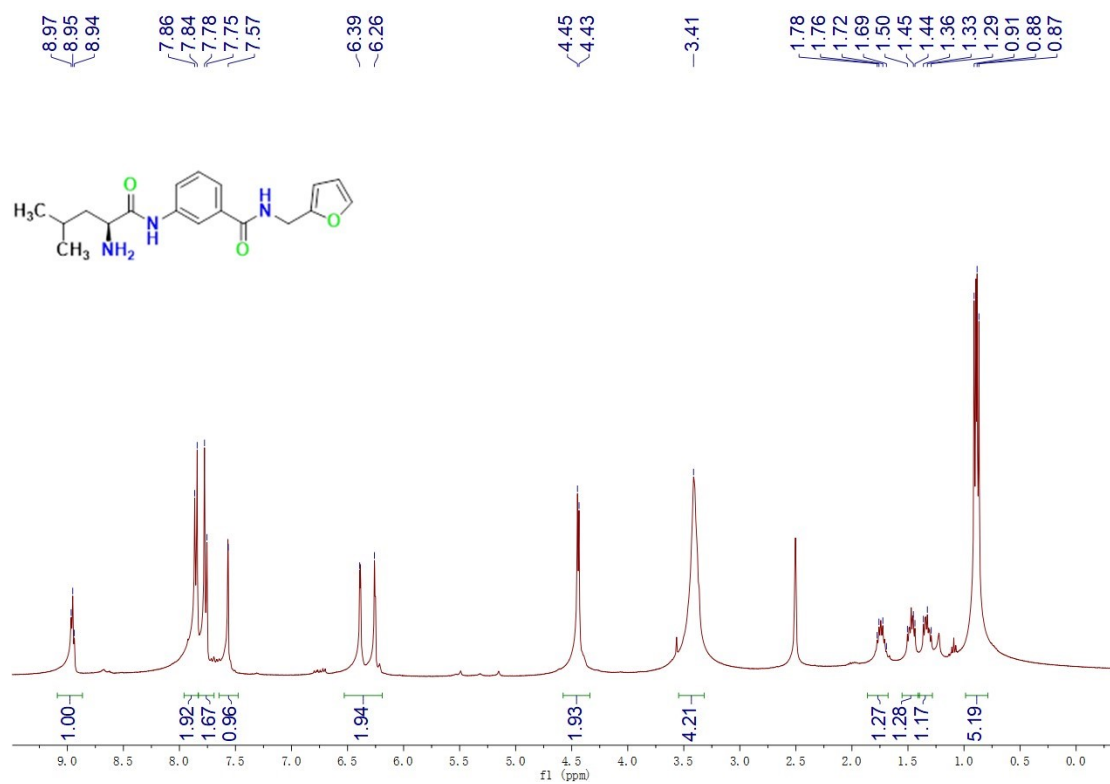

Figure S18. <sup>1</sup>H-NMR spectrum of compound (20)

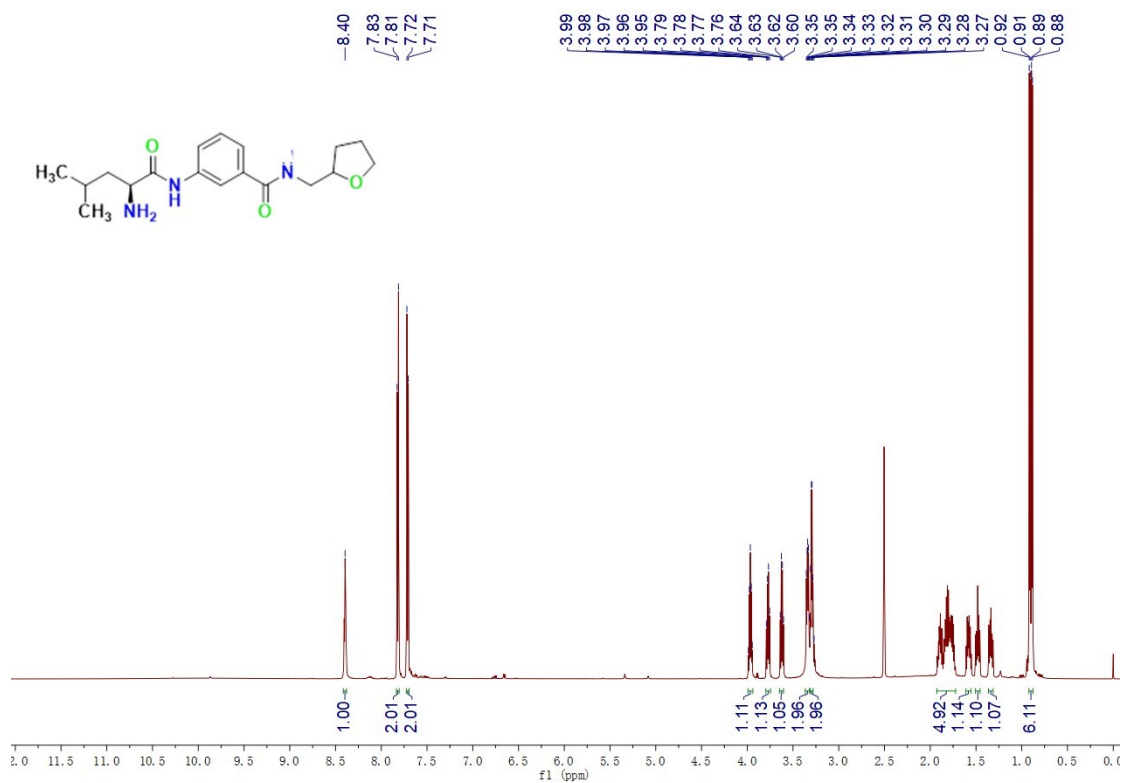

Figure S19. <sup>1</sup>H-NMR spectrum of compound (21)

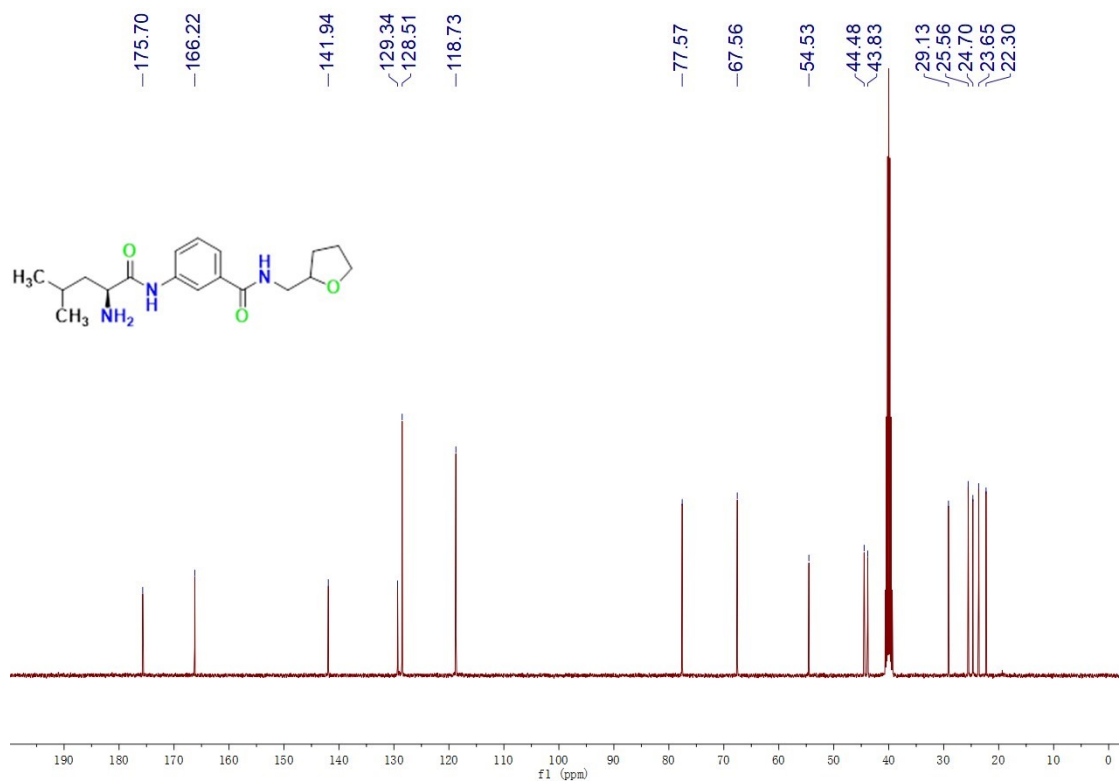

Figure S20. <sup>13</sup>C-NMR spectrum of compound (21)

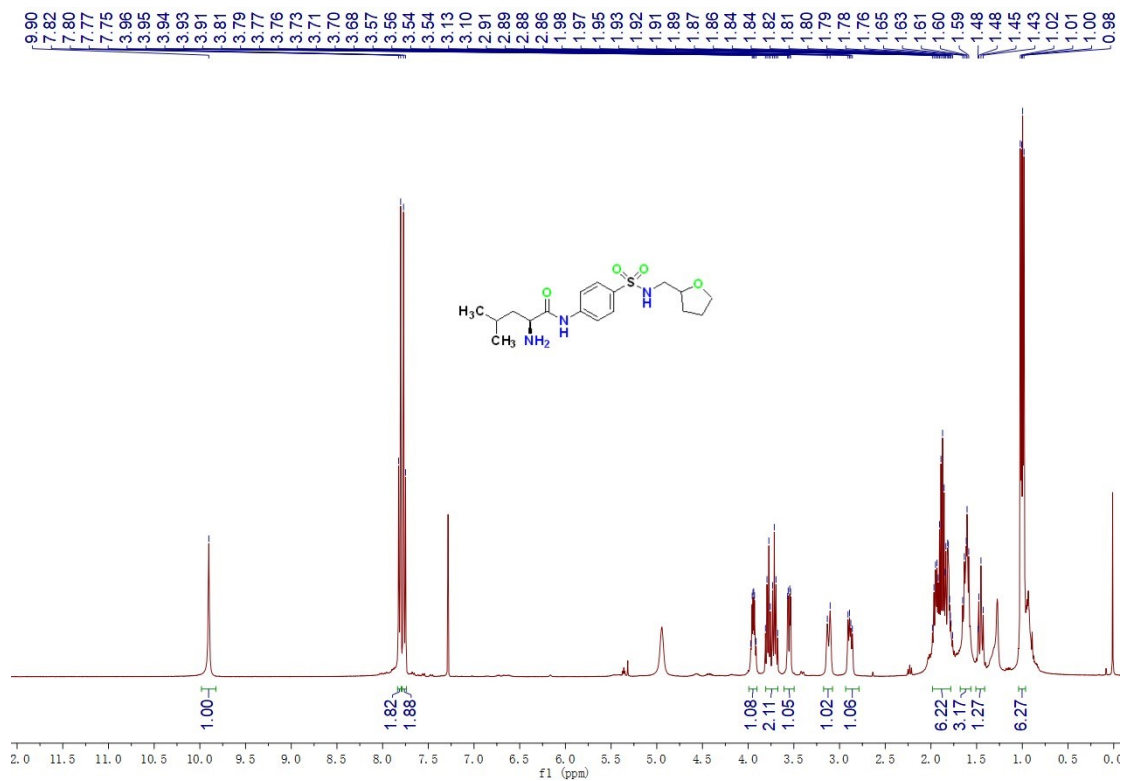

Figure S21. <sup>1</sup>H-NMR spectrum of compound (23)

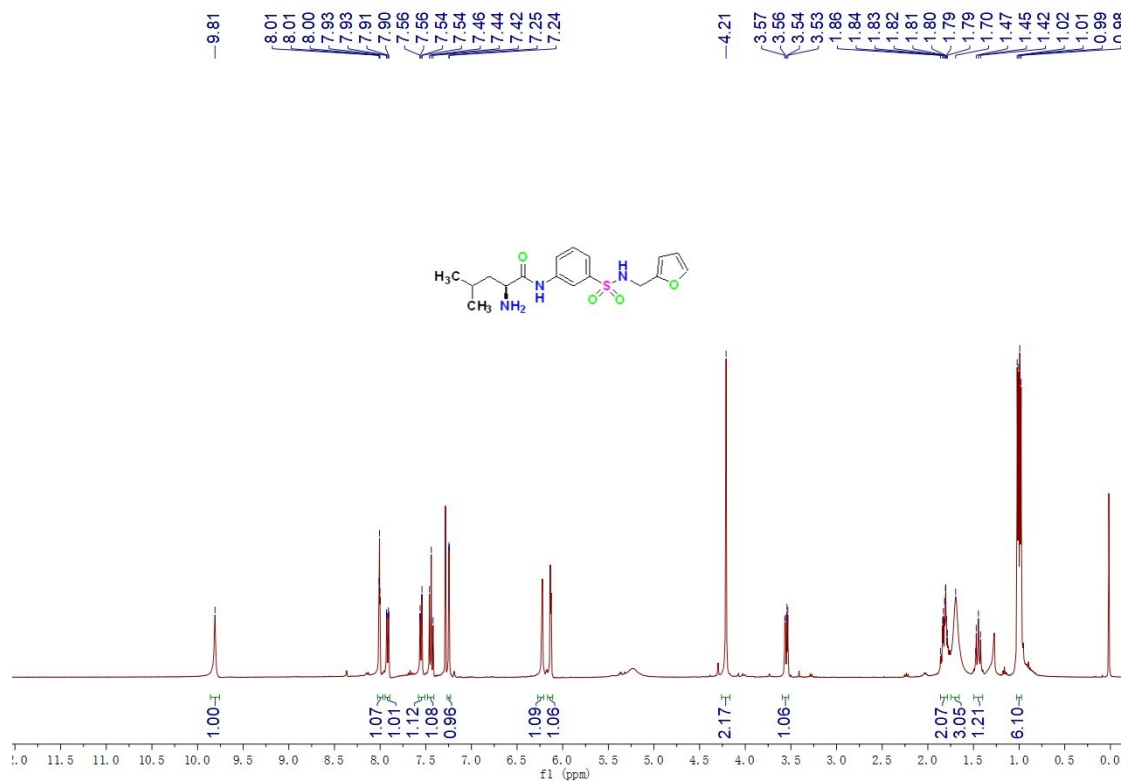

Figure S22. <sup>1</sup>H-NMR spectrum of compound (24)

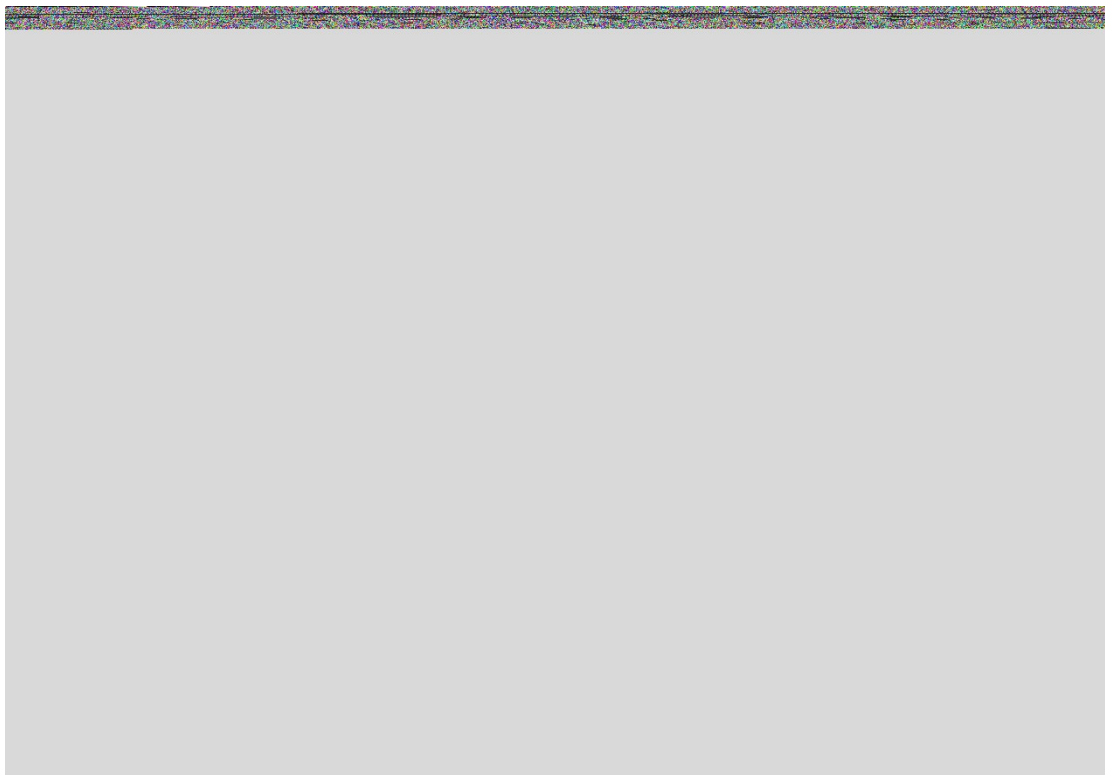

Figure S23. <sup>13</sup>C-NMR spectrum of compound (24)

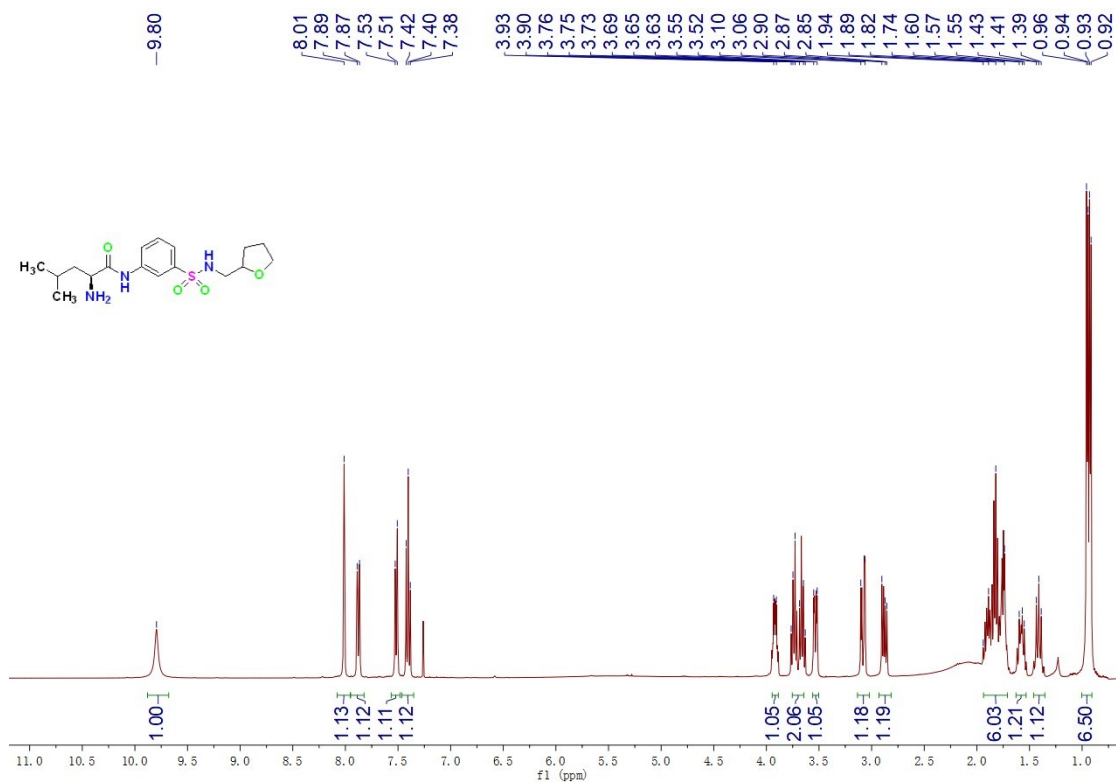

Figure S24. <sup>1</sup>H-NMR spectrum of compound (25)

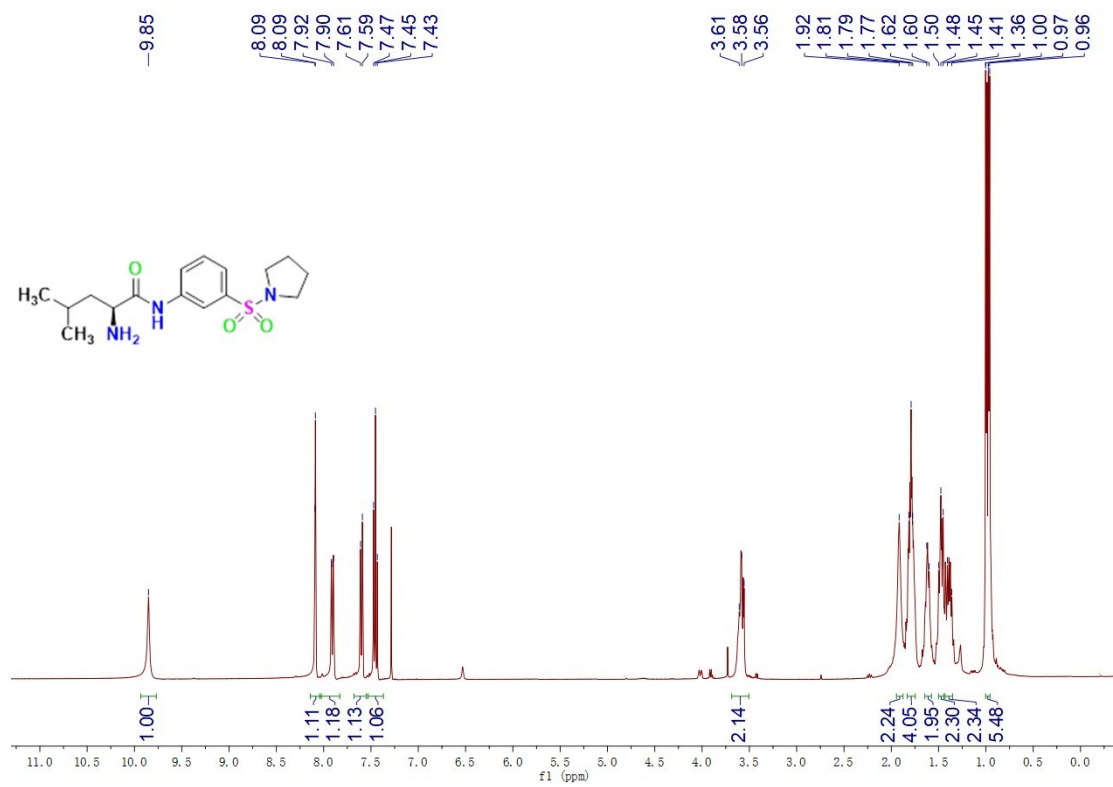

Figure S25. <sup>1</sup>H-NMR spectrum of compound (26)
